# Supplementary material
Source: publisher site journal article supplement (https://www.dovepress.com/article/411860)
Supplement: Supplementary file 1 [file get_supplementary_file.php]

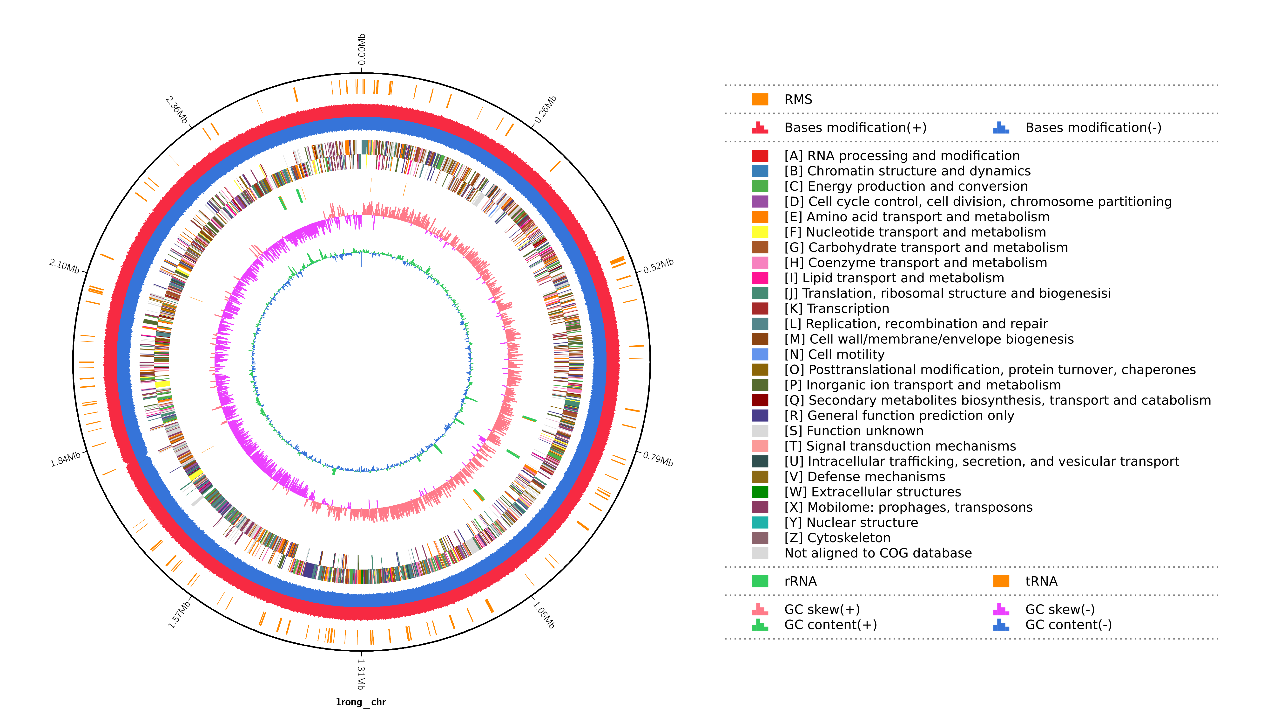


**Figure S1** Chromosome circle diagram of *Staphylococcus haemolyticus* SH-1.


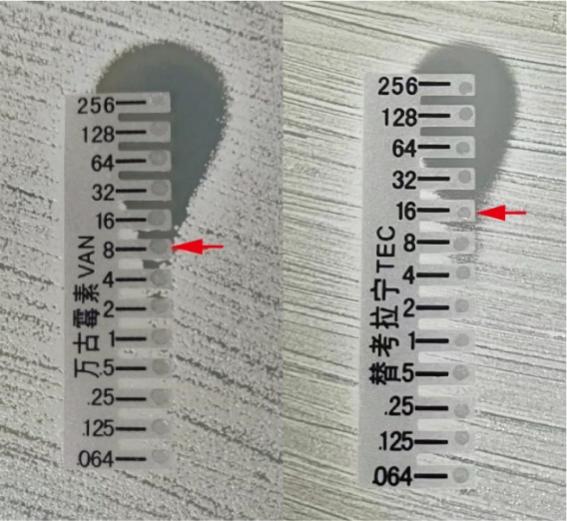


**Figure S2** Vancomycin and teicoplanin susceptibilities of *S.haemolyticus* strain SH-1 determined by E-test.

**Table S1** Antibiotic susceptibility of *Staphylococcus haemolyticus* SH-1.

| **Antibiotics** | **MIC (μg/ml)** | **Sensitivity** |
| --- | --- | --- |
| Teicoplanin | 16 | I |
| Quinupristin/Dalfopristin | 0.5 | S |
| Moxifloxacin | 4 | R |
| Linezolid | 4 | S |
| Cefoxitin Screen | Pos | + |
| Trimethoprim/Sulfa | >= 320 | R |
| Penicillin-G | >= 0.5 | R |
| Rifampin | <= 0.5 | S |
| Tetracycline | 4 | S |
| Vancomycin | 8 | I |
| Levofloxacin | >= 8 | R |
| Inducible Clindamycin Resistance | Pos | + |
| Ciprofloxaxin | >= 8 | R |
| Clindamycin | <= 0.25 | R |
| Oxacillin | >= 4 | R |
| Erythromycin | >= 8 | R |
| Gentamicin | >= 16 | R |

**Notes:** Tested by VITEK 2 COMPACT automatic microbiological analysis system and Test Kit GP67.


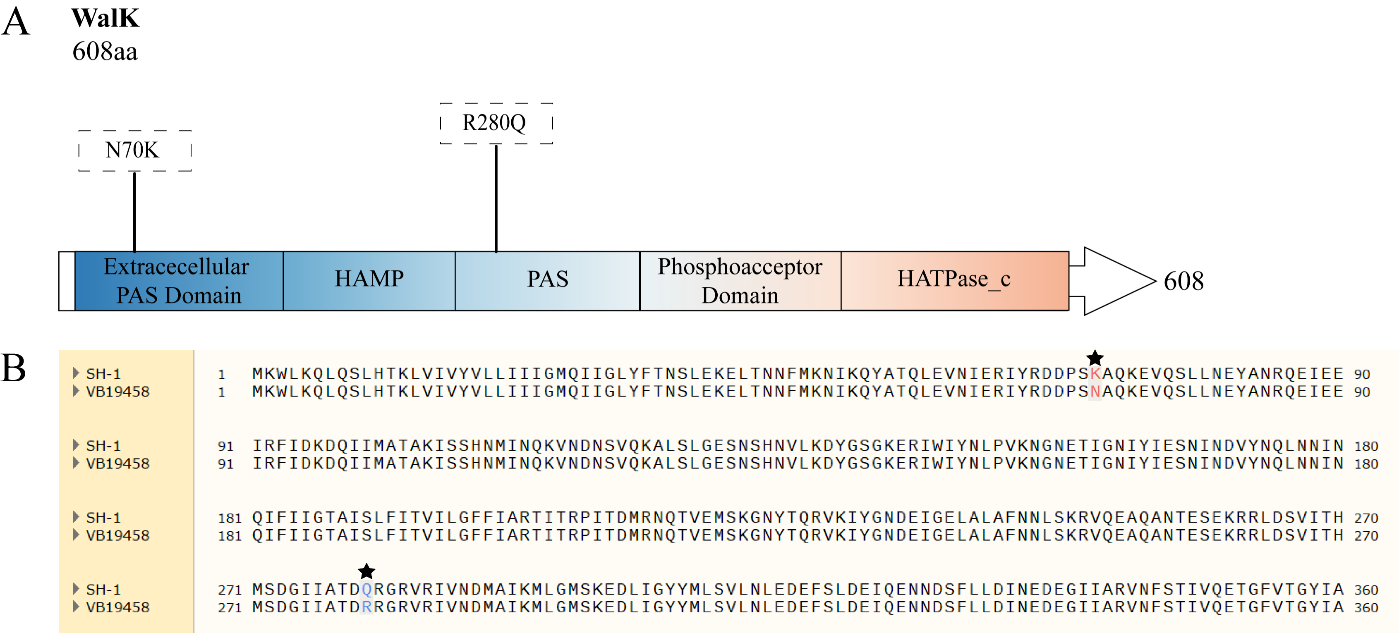


**Figure S3** (**A**) Schematic representation of WalK protein operon structure. The mutation sites of SH-1 were shown above the domains. White regions of WalK represent membrane spanning regions. (**B**) Alignment of the WalK protein sequence between SH-1 and VB19458. Indicated by star and gray shadow is the differential protein that occurs in SH-1.
